# Supplementary material for: Analytical Performance of Clay Paste Electrode and Graphene Paste Electrode-Comparative Study
Source: MDPI journal article supplement (doi:10.3390/molecules27072037), 2022-03-22
Supplement: s1 [file s1]

# EDX analysis of clay paste -ANALYSIS NO. 1

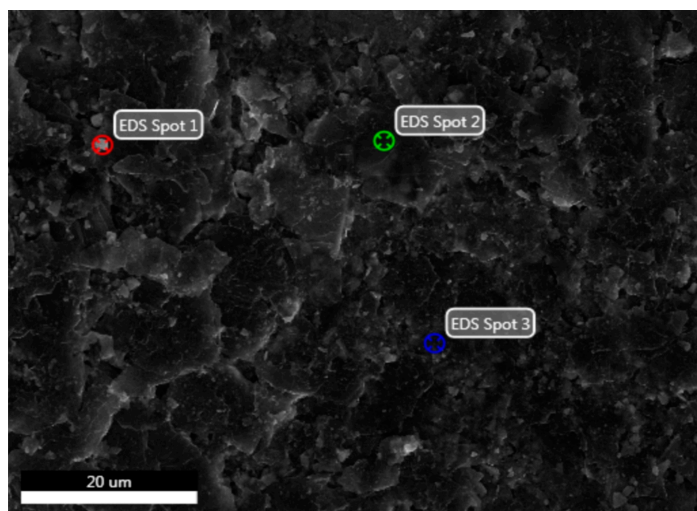

EDS Spot 1

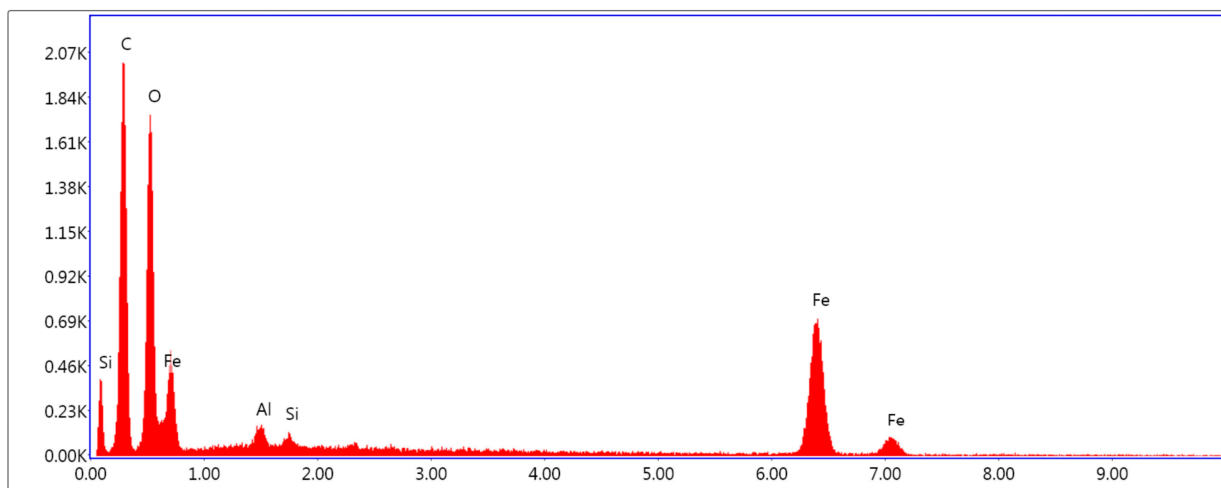

Lsec: 28.8 68 Cnts 2.330 keV Det: Octane Super Det

| Element | Weight % | Atomic % | Net Int. | Error % | Kratio | Z      | R      | A      | F      |
|---------|----------|----------|----------|---------|--------|--------|--------|--------|--------|
| C K     | 39.33    | 59.82    | 472.35   | 8.04    | 0.1785 | 1.1138 | 0.9402 | 0.4074 | 1.0000 |
| O K     | 24.51    | 27.99    | 416.23   | 9.16    | 0.0811 | 1.0625 | 0.9623 | 0.3112 | 1.0000 |
| Al K    | 0.73     | 0.50     | 33.31    | 11.73   | 0.0045 | 0.9401 | 1.0035 | 0.6458 | 1.0047 |
| Si K    | 0.32     | 0.21     | 16.41    | 19.64   | 0.0023 | 0.9599 | 1.0101 | 0.7560 | 1.0075 |
| Fe K    | 35.10    | 11.48    | 348.74   | 3.76    | 0.2924 | 0.7970 | 1.0541 | 1.0103 | 1.0347 |

EDS Spot 2

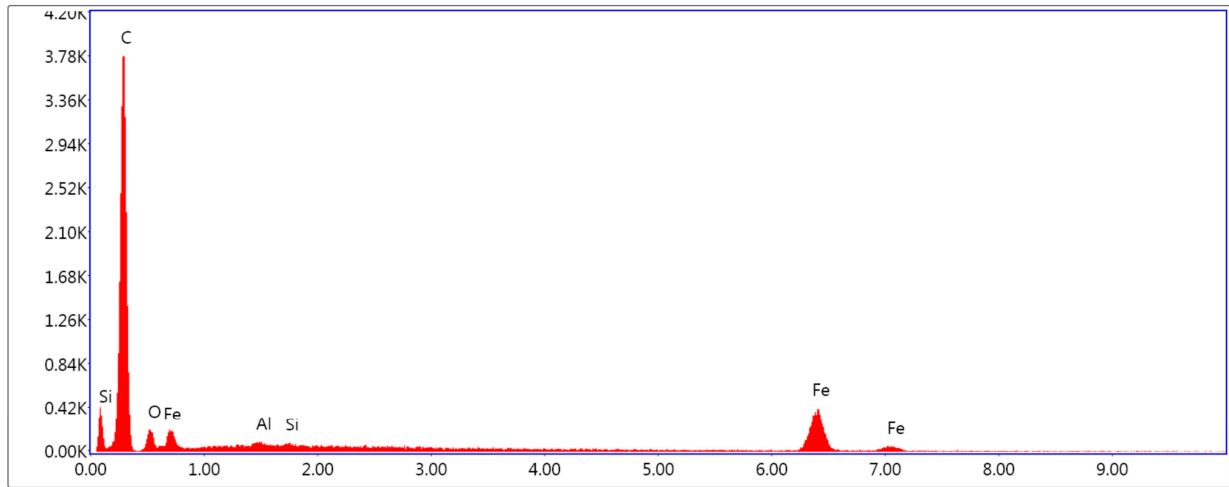

Lsec: 29.3 47 Cnts 2.330 keV Det: Octane Super Det

| Element | Weight % | Atomic % | Net Int. | Error % | Kratio | Z      | R      | A      | F      |
|---------|----------|----------|----------|---------|--------|--------|--------|--------|--------|
| C K     | 69.94    | 88.33    | 861.06   | 6.34    | 0.4109 | 1.0686 | 0.9610 | 0.5498 | 1.0000 |
| O K     | 5.07     | 4.81     | 41.58    | 13.74   | 0.0102 | 1.0181 | 0.9817 | 0.1982 | 1.0000 |
| Al K    | 0.18     | 0.10     | 7.16     | 57.14   | 0.0012 | 0.8991 | 1.0198 | 0.7304 | 1.0050 |
| Si K    | 0.11     | 0.06     | 4.60     | 63.04   | 0.0008 | 0.9179 | 1.0259 | 0.8295 | 1.0080 |
| Fe K    | 24.70    | 6.71     | 186.75   | 4.67    | 0.1978 | 0.7600 | 1.0622 | 1.0131 | 1.0399 |

EDS Spot 3

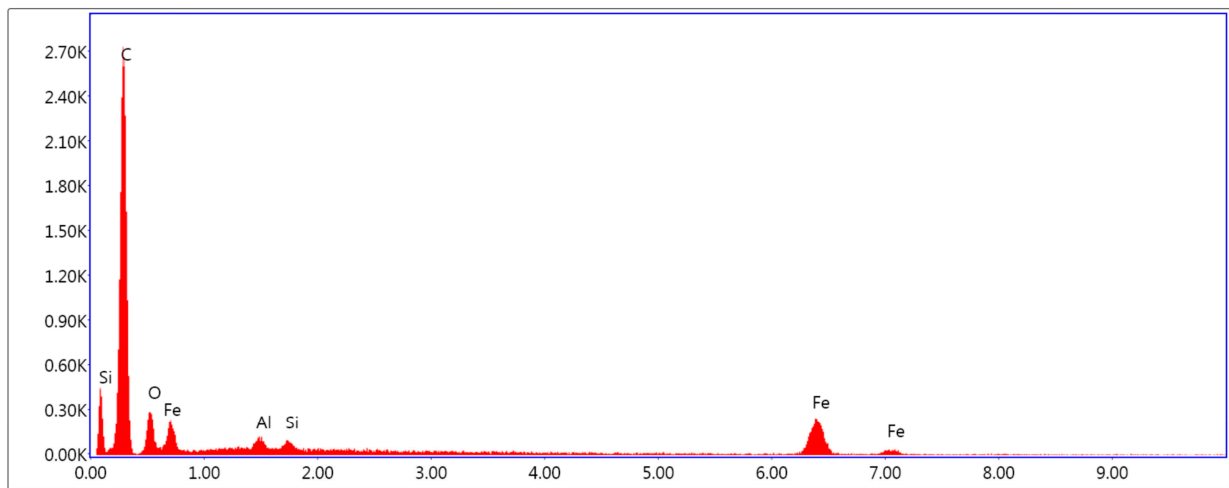

Lsec: 29.3 21 Cnts 2.330 keV Det: Octane Super Det

| Element | Weight % | Atomic % | Net Int. | Error % | Kratio | Z      | R      | A      | F      |
|---------|----------|----------|----------|---------|--------|--------|--------|--------|--------|
| C K     | 68.20    | 84.30    | 615.89   | 6.47    | 0.3973 | 1.0601 | 0.9664 | 0.5495 | 1.0000 |
| O K     | 10.45    | 9.69     | 64.47    | 12.12   | 0.0214 | 1.0096 | 0.9867 | 0.2032 | 1.0000 |
| Al K    | 0.71     | 0.39     | 20.84    | 14.05   | 0.0048 | 0.8911 | 1.0239 | 0.7474 | 1.0050 |
| Si K    | 0.48     | 0.25     | 15.15    | 19.94   | 0.0037 | 0.9095 | 1.0298 | 0.8396 | 1.0077 |
| Fe K    | 20.16    | 5.36     | 112.11   | 5.49    | 0.1605 | 0.7523 | 1.0641 | 1.0128 | 1.0447 |

## EDX analysis of clay paste -ANALYSIS NO. 2

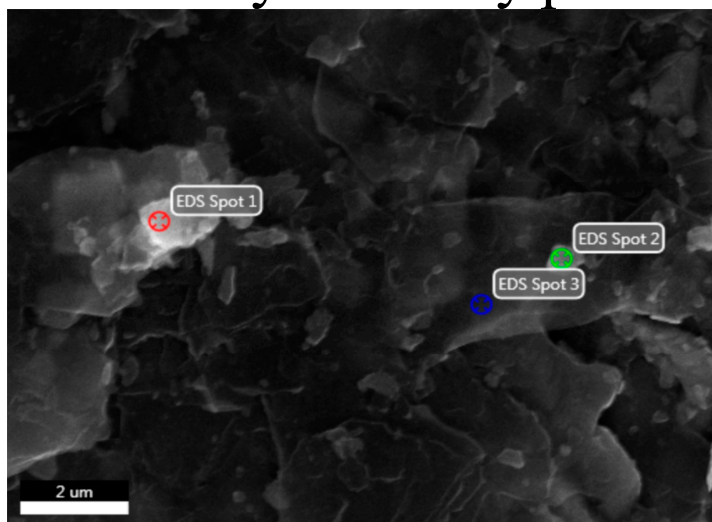

EDS Spot 1

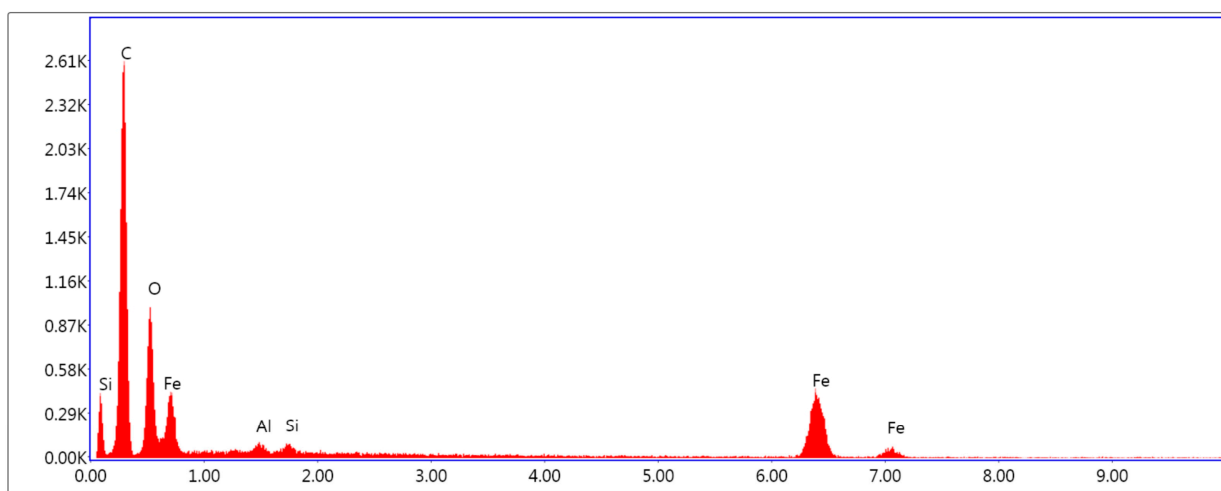

Lsec: 29.2 67 Cnts 1.500 keV Det: Octane Super Det

| Element | Weight % | Atomic % | Net Int. | Error % | Kratio | Z      | R      | A      | F      |
|---------|----------|----------|----------|---------|--------|--------|--------|--------|--------|
| C K     | 52.28    | 70.95    | 583.59   | 7.25    | 0.2688 | 1.0837 | 0.9548 | 0.4745 | 1.0000 |
| O K     | 20.44    | 20.83    | 227.07   | 10.07   | 0.0539 | 1.0329 | 0.9760 | 0.2554 | 1.0000 |
| Al K    | 0.44     | 0.27     | 17.29    | 17.02   | 0.0028 | 0.9126 | 1.0151 | 0.6946 | 1.0048 |
| Si K    | 0.41     | 0.24     | 17.56    | 18.07   | 0.0030 | 0.9317 | 1.0213 | 0.7990 | 1.0075 |
| Fe K    | 26.43    | 7.72     | 209.92   | 4.21    | 0.2146 | 0.7719 | 1.0599 | 1.0120 | 1.0393 |

EDS Spot 2

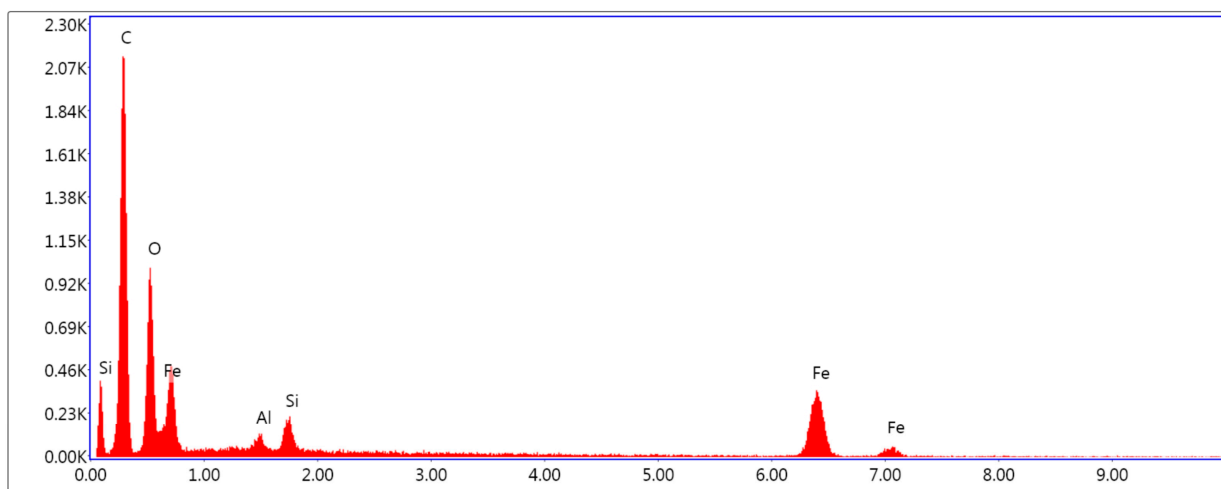

Lsec: 29.2 123 Cnts 1.500 keV Det: Octane Super Det

| Element | Weight % | Atomic % | Net Int. | Error % | Kratio | Z      | R      | A      | F      |
|---------|----------|----------|----------|---------|--------|--------|--------|--------|--------|
| C K     | 51.15    | 68.75    | 487.80   | 7.48    | 0.2529 | 1.0794 | 0.9576 | 0.4581 | 1.0000 |
| O K     | 22.94    | 23.14    | 228.62   | 10.03   | 0.0611 | 1.0286 | 0.9786 | 0.2590 | 1.0000 |
| AlK     | 0.74     | 0.44     | 25.94    | 12.57   | 0.0048 | 0.9085 | 1.0172 | 0.7049 | 1.0051 |
| SiK     | 1.36     | 0.78     | 52.70    | 8.69    | 0.0103 | 0.9275 | 1.0234 | 0.8055 | 1.0072 |
| FeK     | 23.81    | 6.88     | 167.42   | 4.46    | 0.1927 | 0.7679 | 1.0609 | 1.0118 | 1.0417 |

EDS Spot 3

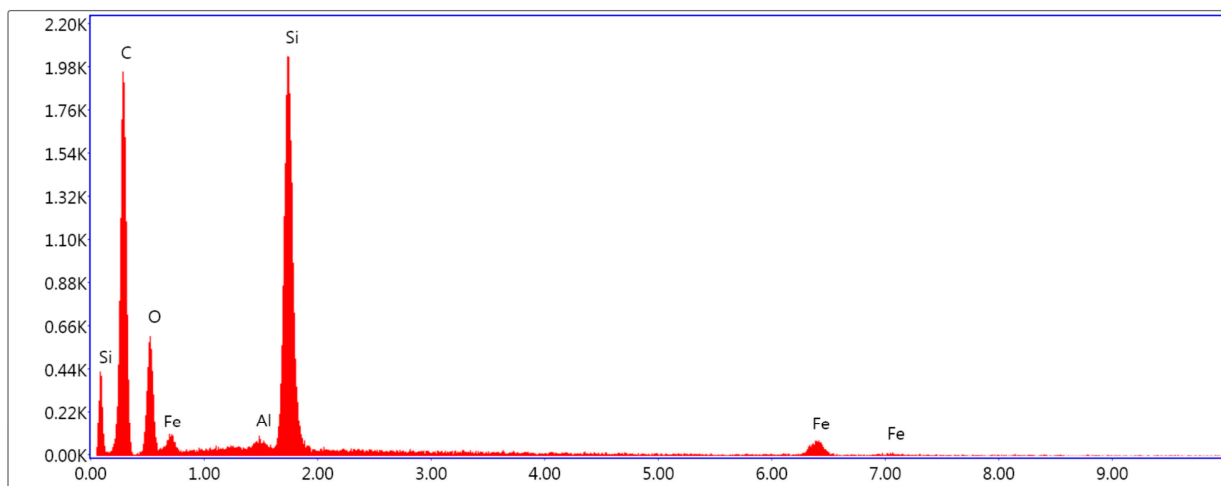

Lsec: 29.2 64 Cnts 1.500 keV Det: Octane Super Det

| Element | Weight % | Atomic % | Net Int. | Error % | Kratio | Z      | R      | A      | F      |
|---------|----------|----------|----------|---------|--------|--------|--------|--------|--------|
| C K     | 63.19    | 75.63    | 435.80   | 8.75    | 0.2235 | 1.0415 | 0.9791 | 0.3396 | 1.0000 |
| O K     | 17.39    | 15.63    | 132.10   | 11.33   | 0.0349 | 0.9908 | 0.9984 | 0.2026 | 1.0000 |
| AlK     | 0.28     | 0.15     | 11.52    | 21.86   | 0.0021 | 0.8729 | 1.0334 | 0.8390 | 1.0150 |
| SiK     | 14.39    | 7.37     | 610.79   | 3.08    | 0.1176 | 0.8908 | 1.0389 | 0.9138 | 1.0045 |
| FeK     | 4.75     | 1.22     | 33.93    | 12.58   | 0.0386 | 0.7348 | 1.0685 | 1.0119 | 1.0947 |

# EDX analysis of graphene paste

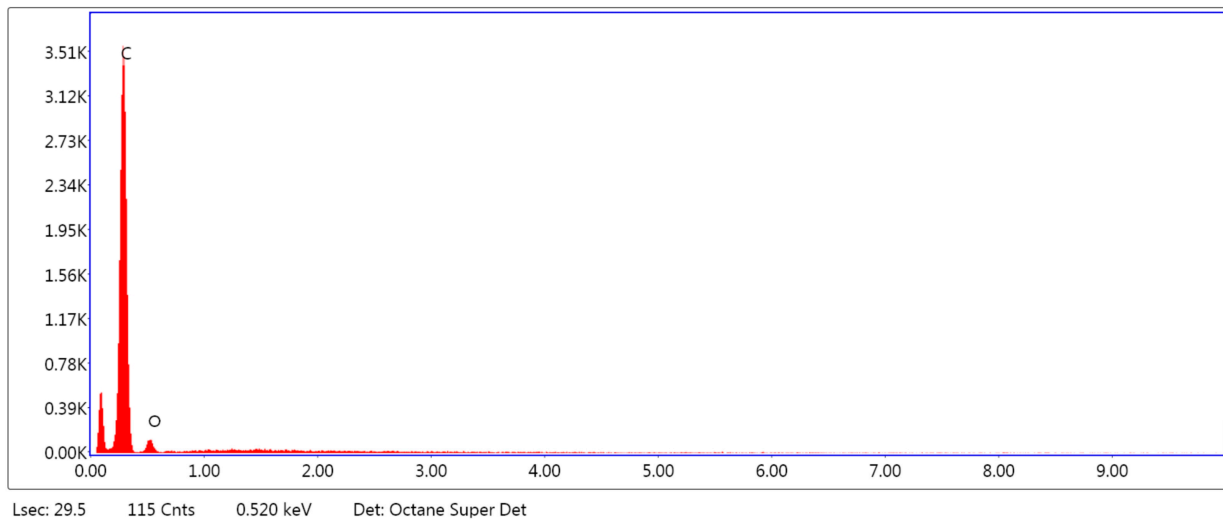

| Element | Weight % | Atomic % | Net Int. | Error % | Kratio | Z      | R      | A      | F      |
|---------|----------|----------|----------|---------|--------|--------|--------|--------|--------|
| C K     | 91.06    | 93.14    | 831.68   | 2.63    | 0.8410 | 1.0043 | 0.9983 | 0.9195 | 1.0000 |
| O K     | 8.94     | 6.86     | 25.89    | 14.84   | 0.0135 | 0.9540 | 1.0157 | 0.1577 | 1.0000 |

# XRF analysis of clay powder

| Element | [mass %]        |
|---------|-----------------|
| Na      | 0,025 ± 0,003   |
| Mg      | 0,060 ± 0,004   |
| Al      | 1,74 ± 0,05     |
| Si      | 1,26 ± 0,04     |
| P       | 0,050 ± 0,003   |
| S       | 0,046 ± 0,003   |
| Cl      | 0,012 ± 0,002   |
| K       | 0,027 ± 0,003   |
| Ca      | 0,119 ± 0,005   |
| Sc      | 0,0029 ± 0,0007 |
| Ti      | 0,042 ± 0,004   |
| V       | 0,013 ± 0,002   |
| Cr      | 0,0087 ± 0,0013 |
| Mn      | 0,090 ± 0,005   |
| Fe      | 65,20 ± 1,20    |
| Zn      | 0,0037 ± 0,0008 |
| As      | 0,014 ± 0,002   |
| Zr      | 0,0018 ± 0,0005 |
| Sb      | 0,012 ± 0,002   |
